# Supplementary material for: Risk Factors, Clinical Characteristics, and Prognosis of Acute Kidney Injury in Hospitalized COVID-19 Patients: A Retrospective Cohort Study
Source: PubMed Central journal article supplement (PMC7825666; doi:10.3390/medicines8010004), 2021-01-07
Supplement: medicines-08-00004-s001.pdf [file medicines-08-00004-s001.pdf]

# Supplementary Materials: Risk Factors, Clinical Characteristics, and Prognosis of Acute Kidney Injury in Hospitalized COVID-19 Patients: A Retrospective Cohort Study

Panupong Hansrivijit, Kinjal P. Gadhiya, Mounika Gangireddy and John D. Goldman

## 1. Data collection (con't):

The demographic data included age, sex, and ethnicity. Co-morbidities included current/prior history of smoking, obesity (BMI  $\geq 30$  kg/m<sup>2</sup>), hypertension, diabetes mellitus, hyperlipidemia, coronary artery disease, heart failure/cardiomyopathy, arrhythmia, chronic kidney disease, end-stage kidney disease (ESKD), asthma/chronic pulmonary obstructive disease, and cerebrovascular diseases.

Laboratory findings were recorded: leukocytosis (white blood cells count  $>9500/\mu\text{L}$ ), leukopenia (white blood cells count  $<3900/\mu\text{L}$ ), lymphocytopenia (absolute lymphocytes count  $<600/\mu\text{L}$ ), thrombocytosis (platelets  $>400,000/\mu\text{L}$ ), and thrombocytopenia (platelets  $<140,000/\mu\text{L}$ ), respiratory acidosis (arterial pH  $< 7.35$  and arterial partial pressure of CO<sub>2</sub>  $>45$  mmHg), transaminitis (alanine transaminase  $>3$  times of upper normal limit). Serum creatinine (mg/dL) was measured by enzymatic assay. Elevation of serum D-dimer ( $>500$  ng/mL), ferritin ( $>336$  ng/mL) lactate dehydrogenase (LDH;  $>200$  U/L), C-reactive protein ( $>1$  mg/dL), procalcitonin ( $>0.25$  ng/mL), and troponin I ( $>0.03$  ng/mL) were recorded. Acute respiratory distress syndrome (ARDS) was defined by the Berlin criteria [16]. Arrhythmias as complications were defined either brady- or tachyarrhythmia that were new-onset, occurred during hospitalization with COVID-19. In this study, Prolongation of QT segment was defined as the QT duration  $>500$  milliseconds.

| Clinical Criteria            | Prerenal AKI                                                                                              | Intrinsic AKI                                                                                             |
|------------------------------|-----------------------------------------------------------------------------------------------------------|-----------------------------------------------------------------------------------------------------------|
| <b>Major criterion</b>       |                                                                                                           |                                                                                                           |
| Response to volume repletion | Rapid decrease of creatinine with convergence to baseline levels                                          | No reconstitution of renal function                                                                       |
| <b>Minor criteria</b>        |                                                                                                           |                                                                                                           |
| History                      | Dehydration, loss of extracellular fluid, heart failure, liver failure, inadequate use of diuretics, etc. | Prolonged shock, exposition to nephrotoxins, extrarenal suggestive symptoms e.g. pulmonary syndrome, etc. |
| Physical examination         | Low blood pressure, low jugular pulse, tachycardia, orthostatic changes, poor skin turgor                 | Absence of signs of dehydration, cardiac monitoring shows adequate volemia                                |
| Urinary examination          | Absence of proteinuria, hematuria, and leukocyturia                                                       | Proteinuria and/or hematuria and/or leukocyturia                                                          |

AKI, acute kidney injury

The diagnosis of prerenal AKI and intrinsic AKI requires one major criterion AND two minor criteria

Adapted from Heller F, Frischmann S, Grunbaum M, et al. Urinary calprotectin and the distinction between prerenal and intrinsic acute kidney injury. Clin J Am Soc Nephrol 2011;6(10):2347-2355.

Figure S1. Classification criteria of pre-renal acute kidney injury and intrinsic acute kidney injury. Supplemental Document 1. Detailed explanation of the data collection process.
